# Supplementary material for: Customizing a Program for Older Adults Living with Frailty in Primary Care
Source: PubMed Central journal article supplement — J Prim Care Community Health. 2021 Jul 27;12:21501327211034807. doi: 10.1177/21501327211034807 (PMC8323414; doi:10.1177/21501327211034807), 2021-07-27
Supplement: sj-pdf-2-jpc-10.1177_21501327211034807.pdf [file sj-pdf-2-jpc-10.1177_21501327211034807.pdf]

# SAGE AUTHORSHIP CHANGE REQUEST

## INSTRUCTIONS:

Please complete all sections of this form. We require that **all** authors (including current co-authors, those to be added and those to be removed) sign the relevant sections below. We require all signatures on the same copy of the form. Once complete, please email the form back to the sender.

## SECTION ONE: PAPER INFORMATION

|              |                                                                       |                      |
|--------------|-----------------------------------------------------------------------|----------------------|
| JOURNAL NAME | Journal of Primary Care and Community Health                          |                      |
| PAPER TITLE  | Customizing a Program for Older Adults Living with Frailty in Primary | MANUSCRIPT ID NUMBER |
|              |                                                                       | JPC-21-0123.R1       |

## SECTION TWO: ESSENTIAL CONDITIONS FOR CHANGE

The new author list should contain only those who can legitimately claim authorship. This is all those who:

- 1) Have made a substantial contribution to the concept or design of the article; or the acquisition, analysis, or interpretation of data for the article; AND
- 2) Drafted the article or revised it critically for important intellectual content; AND
- 3) Approved the version to be published; AND
- 4) Agreed to be accountable for all aspects of the work in ensuring that questions related to the accuracy or integrity of any part of the work are appropriately investigated and resolved.

NB: Registered authors should meet the conditions of all of the points above. All contributors who do not meet the criteria for authorship should instead be listed in an 'Acknowledgements' section.

## SECTION THREE: REASON FOR AUTHORSHIP CHANGE

Please provide a detailed explanation for the change in authors in the box below.

In this paper's first submission to the journal, there was minimal results data presented. The inclusion of increased results was requested by the two reviewers of the initial submission. In order to include the data that was requested, the frontline social worker who has been collecting the data needed to review the data, run it through the data management software and pull various reports and graphs to support the written submission. This work was substantial, and contributed to clarity in the written submission itself. The amount of work contributed was enough to warrant inclusion as a co-author.
